# Supplementary material
Source: PubMed Central journal article supplement (PMC6579606)
Supplement: NIHMS1034254-supplement-Supplementary_material.pdf [file NIHMS1034254-supplement-Supplementary_material.pdf]

Fig.S1

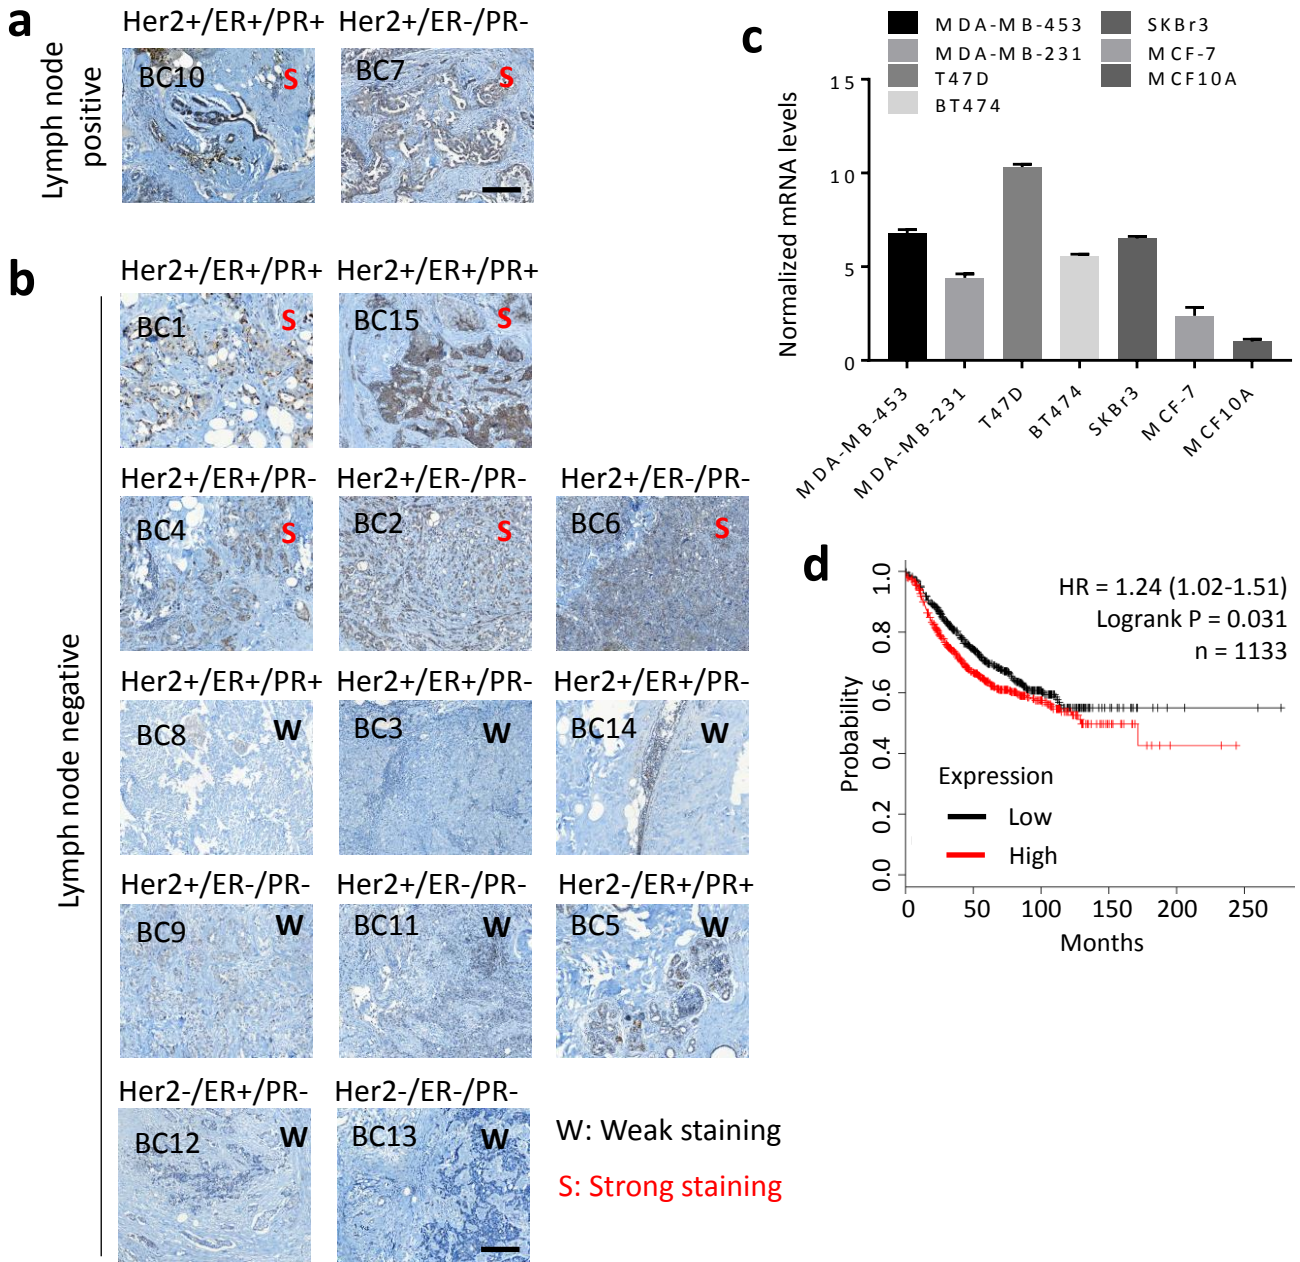

**Figure S1. Detection of EGFL6 in tumor tissues by IHC staining and its correlation with survival probability.** **a** and **b**, FFPE-fixed tumor tissues from breast cancer patients were stained with anti-EGFL6 antibody (Sigma) and a representative image from each tumor slide is shown. Patient tumor properties including lymph node positivity are grouped in A, for node positive and B, for node negative tumors. Strong (S) or weak (W) staining of EGFL6 is indicated on the inside of each images. Scale bar, 100  $\mu$ m. **c**, Expression of EGFL6 in breast cancer cell was measured by qRT-PCR, n=3, error bars for standard deviation (SD). **d**, Kaplan Meier survival correlation with EGFL6 expression. Median level was used for dividing high vs. low expression groups using a data base for breast cancer patients in <https://omictools.com/kaplan-meier-plotter-tool>.

**Fig.S2**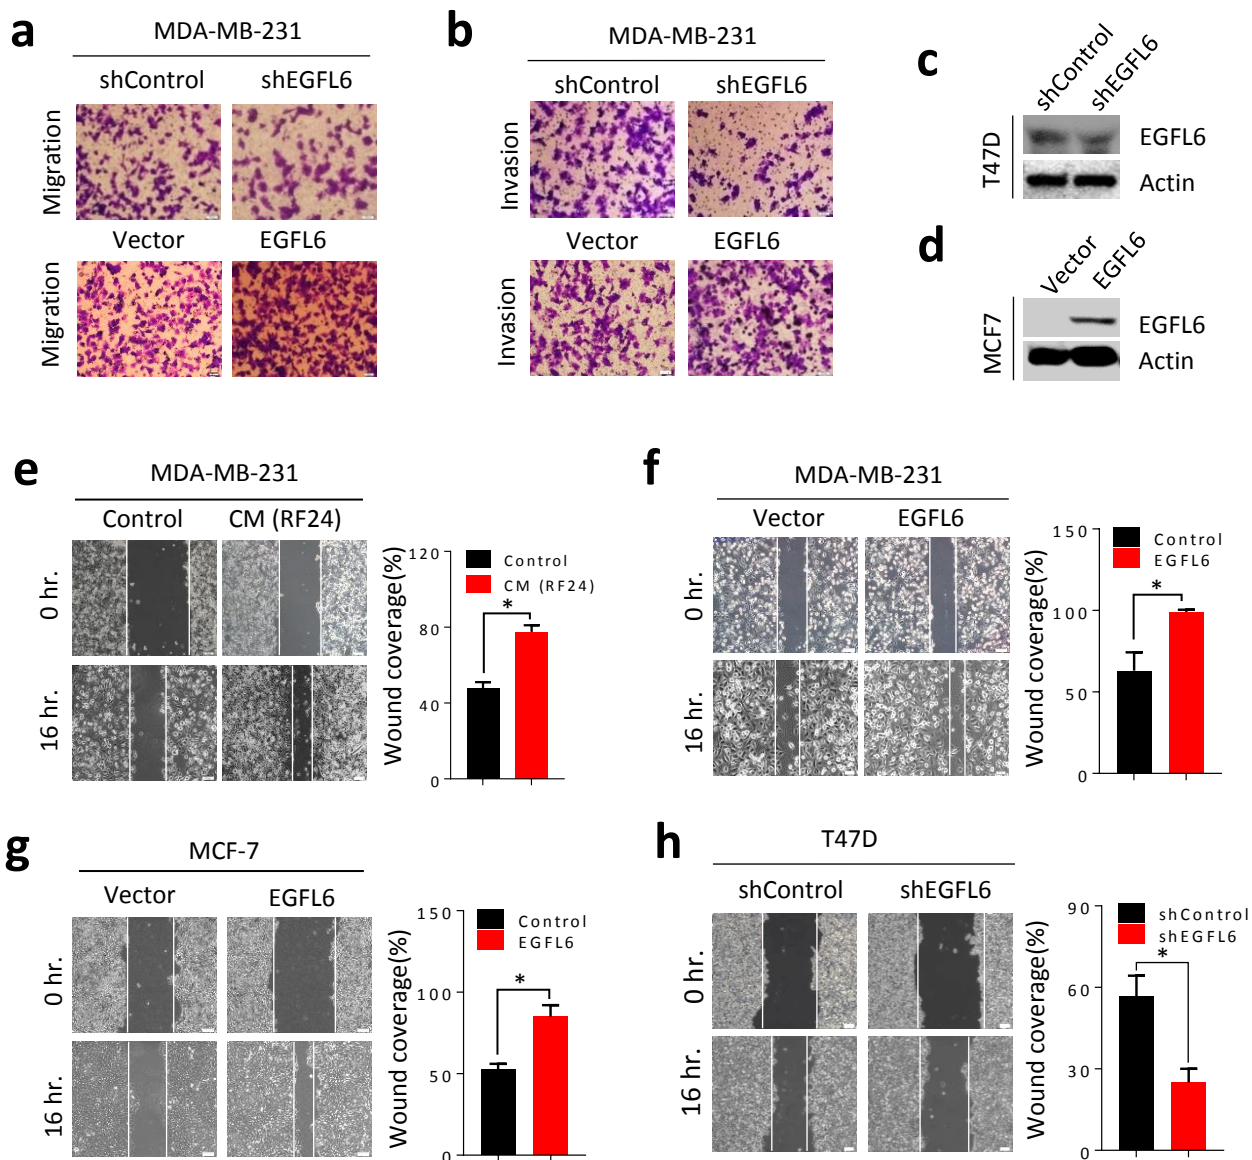

**Figure S2. Effects of EGFL6 expression on cancer cell migration.** **a** and **b**, Representative images of migration and invasion of MDA-MB-231/shEGFL6 breast cancer cells in comparison with the parental control cells (shControl). **c**, Western blot detection of EGFL6 in T47D/shEGFL6 cells and control cell lysates. **d**, Western blot detection of EGFL6 in MCF-7/EGFL6 and parental MCF-7 cells. **e**, Representative images and quantitation of the scratched areas covered by cells after 16 hours of culture, in relative to the area (%) scratched at 0 hour in a humidified incubator at 37°C, 5% CO<sub>2</sub>. MDA-MB-231 cells cultured in media containing the conditioned medium (CM-RF24) were compared with the parental (Control) cells for coverage of scratched area. CM-RF24 was collected from 24 hour cultures of RF24 cells. **f**, **g**, and **h**, Wound healing assays were performed in the same way as in E for the paired cell lines of MDA-MB-231, MCF-7 and T47D with expression or knockdown of EGFL6, respectively. Representative images and quantitative results of coverage of scratch wound are shown, n=3 \*, p < 0.05, error bars indicate SD.

Fig.S3

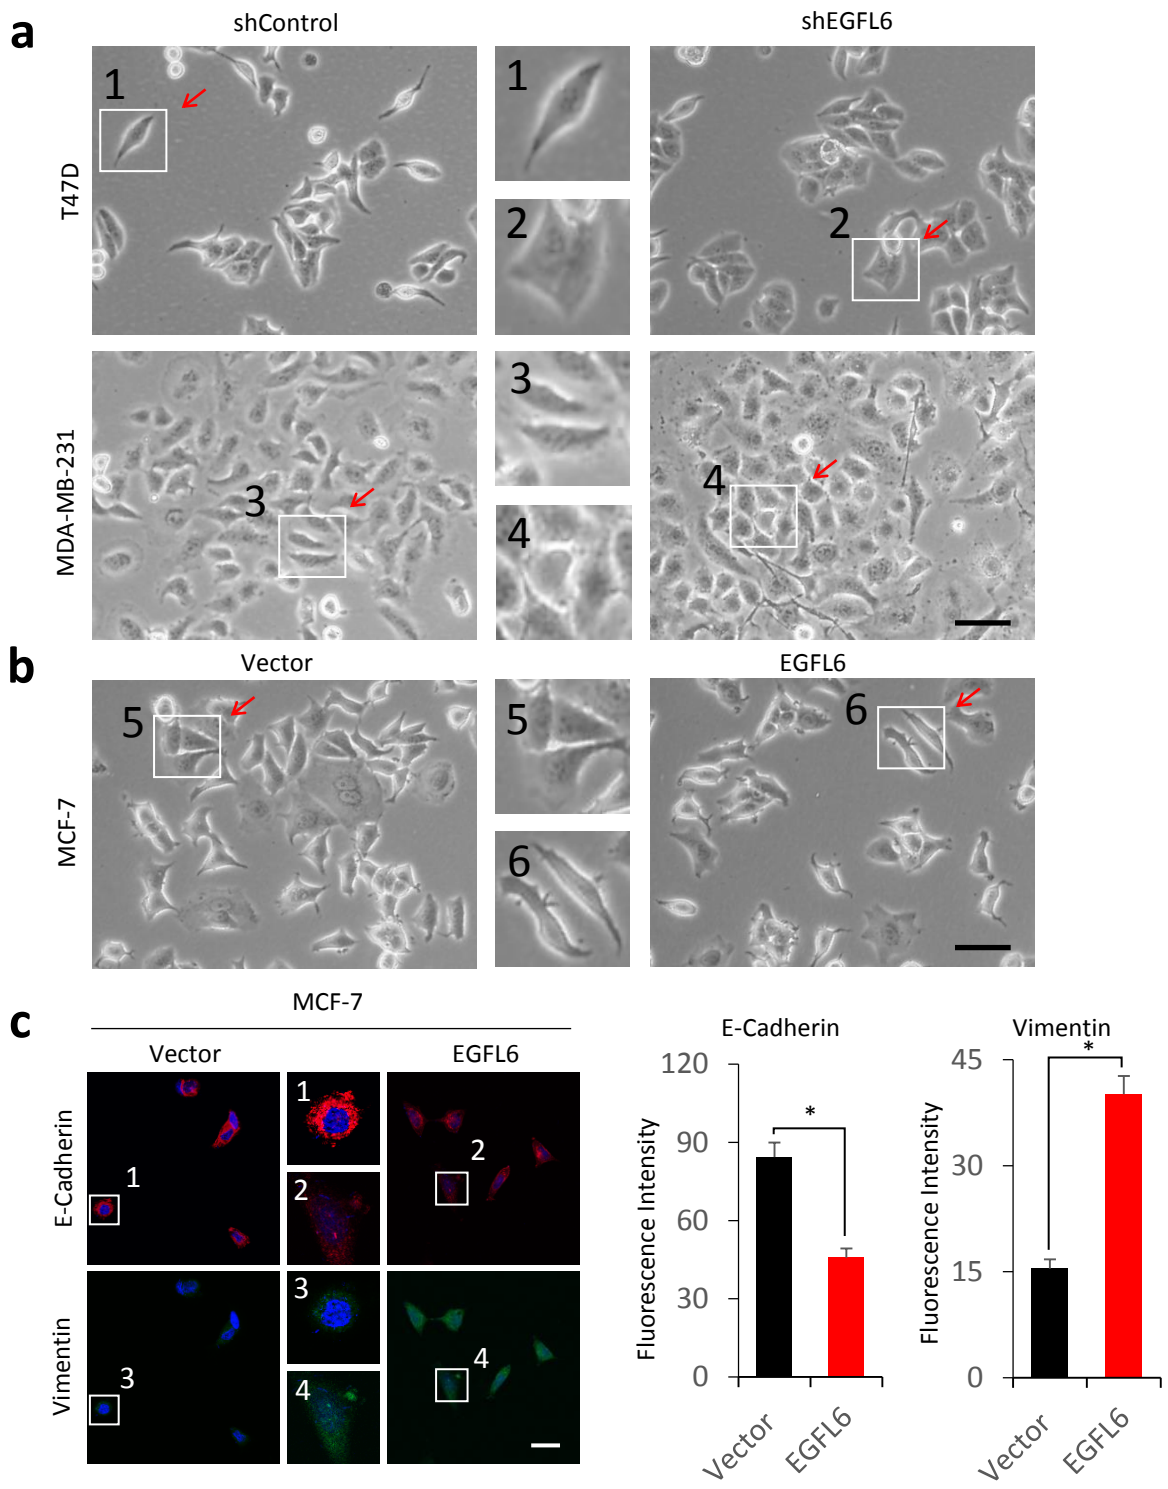

**Figure S3. EGFL6 expression is associated with EMT.** **a**, Morphological images of the paired T47D and T47D/shEGFL6 and MDA-MB-231 and MDA-MB-231/shEGFL6. Scale bar, 40  $\mu\text{m}$ . **b**, Morphological images of MCF-7 in comparison with MCF-7/EGFL6 cells. Scale bar, 40  $\mu\text{m}$ . **c**, Immunofluorescence staining of E-cadherin (Red) and vimentin (Green) in paired MCF-7 and MCF-7/EGFL6 cells. Nuclei were visualized with DRAQ5 staining (blue). Representative images and quantitative data of the staining intensity by image J are shown.  $p < 0.05$ . Error bar, SD. Scale bar, 20  $\mu\text{m}$ . All experiments were repeated three times,  $n=3$ .



Fig.S4

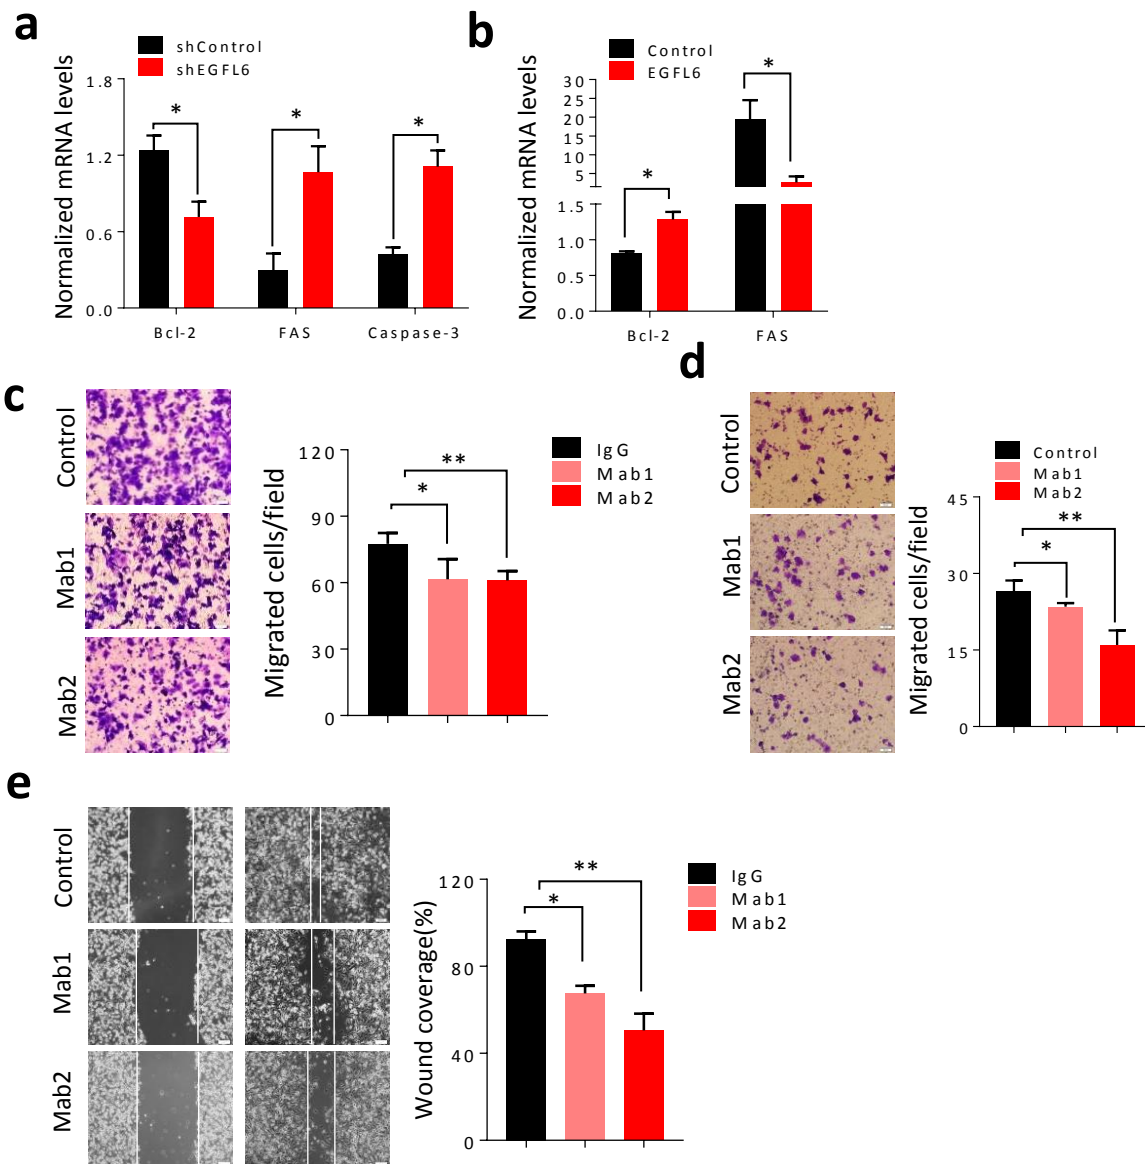

**Figure S4. Anti-EGFL6 antibody showed inhibition of cancer cell migration and knockdown EGFL6 increased cell apoptosis.** **a**, Increased apoptosis markers in EGFL6 knockdown cells (T47D/shEGFL6) in comparison with the parental control (shControl) by qRT-PCR. **b**, Decreased apoptosis markers in MCF-7/EGFL6 cells (EGFL6) in comparison with the parental MCF-7 cells (Control) by qRT-PCR. **c**, Representative images and quantitative results are shown for MDA-MB-231/EGFL6 cells treated with anti-EGFL6 antibodies Mab1 and Mab2 for 24 hours, at 10 $\mu$ g/ml concentration and isotype IgG was used as a treatment control. **d**, Representative images and quantitative results are shown for T47D cells treated with anti-EGFL6 antibodies Mab1 and Mab2 for 24 hours, at 10 $\mu$ g/ml concentration and isotype IgG was used as a treatment control. **e**, Inhibition of cell migration by anti-EGFL6 antibodies Mab1 and Mab2 (10 $\mu$ g/ml) in MDA-MB-231/EGFL6 cells by wound healing assay. Representative images and quantitative results are shown. All experiments were repeated 3 times, \*,  $p < 0.05$ , \*\*,  $p < 0.01$ , and error bars indicate standard deviation (SD).

TableS1: Primers for qRT-PCR

|               |                           |
|---------------|---------------------------|
| E-cadherin-F  | GTCTCTCTCACCACTCCACAG     |
| E-cadherin-R  | CTCGGACACTTCCACTCTCTTT    |
| Vimentin-F    | GAAGAGAACTTTGCCGTTGAAG    |
| Vimentin-R    | GAAGGTGACGAGCCATTTC       |
| Twist-F       | GCAAGAAGTCGAGCGAAGAT      |
| Twist-R       | GCTCTGCAGCTCCTCGAA        |
| N-cadherin-F  | TGCTACTTTCCTTGCTTCTGAC    |
| N-cadherin-R  | TAACACTTGAGGGGCATTGTC     |
| Fibronectin F | AGGAAGCCGAGGTTTTAACTG     |
| Fibronectin R | AGGACGCTCATAAGTGTCACC     |
| Snai1-F       | TCGGAAGCCTAACTACAGCGA     |
| Snai1-R       | AGATGAGCATTGGCAGCGAG      |
| ALCAM-F       | TCCTGCCGTCTGCTCTTCT       |
| ALCAM-R       | TTCTGAGGTACGTCAAGTCGG     |
| BMI1-F        | CGTGTATTGTTGTTACCTGGA     |
| BMI1-R        | TTCAGTAGTGGTCTGGTCTTGT    |
| CD44-F        | CTGCCGCTTTCAGGTGTA        |
| CD44-R        | CATTGTGGGCAAGGTGCTATT     |
| ITGB1-F       | CCCAGAGGCTCCAAAGATATAAA   |
| ITGB1-R       | GCTGTGGTTGGATCTGAGTAA     |
| FGFR2-F       | ACTGGAGCCTCATTATGGAAAG    |
| FGFR2-R       | AGGTGGTACGTGTGATTGATG     |
| KLF4-F        | TCGCCTTGCTGATTGTCTATT     |
| KLF4-R        | AATTGGCCGAGATCCTTCTTC     |
| SOX2-F        | GAGAGAAAGAAGAGGAGAGAGAAAG |
| SOX2-R        | GCCGCCGATGATTGTTATTATT    |
| NANOG-F       | CTCCCTAACAGCTGGGATTTAC    |
| NANOG-R       | GACGGCAGCCAAGGTTATTA      |
| OCT4-F        | GGAGGAAGCTGACAACAATGA     |
| OCT4-R        | CTCTCACTCGTTCTCGATACT     |
